# Supplementary material for: Interview Invitations for Otolaryngology Residency Positions Across Demographic Groups Following Implementation of Preference Signaling
Source: PubMed Central journal article supplement (PMC9993176; doi:10.1001/jamanetworkopen.2023.1922), 2023-03-07
Supplement: jamanetwopen-e231922-s001.pdf [file jamanetwopen-e231922-s001.pdf]

## Supplemental Online Content

Pletcher SD, Chang CWD, Thorne MC, et al. Interview invitations for otolaryngology residency positions across demographic groups following implementation of preference signaling. *JAMA Netw Open*. 2023;6(3):e231922. doi:10.1001/jamanetworkopen.2023.1922

**eTable.** Comparison of Program Characteristics for the Study Samples and All Otolaryngology Programs

This supplemental material has been provided by the authors to give readers additional information about their work.

**eTable.** Comparison of Program Characteristics for the Study Samples and All Otolaryngology Programs

|                                                           | <b>Model 1<br/>Full Sample<br/>N Programs =<br/>85</b> | <b>Model 2<br/>Gender Sample<br/>N Programs =<br/>67</b> | <b>Model 3<br/>URM* Sample<br/>N Programs =<br/>46</b> | <b>Otolaryngology<br/>Population<br/>N Programs =<br/>118</b> |
|-----------------------------------------------------------|--------------------------------------------------------|----------------------------------------------------------|--------------------------------------------------------|---------------------------------------------------------------|
| <b>Average Number of Applications Received: Mean (SD)</b> | 376 (95)                                               | 397 (83)                                                 | 372 (32)                                               | 370 (97)                                                      |
| <b>Average USMLE Step1: Score, Mean (SD)</b>              | 244.4 (14.2)                                           | 244.4 (14.2)                                             | 245 (13.8)                                             | 244.4 (8.4)                                                   |
| <b>Region</b>                                             | <b>N (%)</b>                                           | <b>N (%)</b>                                             | <b>N (%)</b>                                           | <b>N (%)</b>                                                  |
| Central                                                   | 26 (31%)                                               | 19 (28%)                                                 | 13 (28%)                                               | 34 (29%)                                                      |
| Northeast                                                 | 25 (29%)                                               | 19 (28%)                                                 | 13 (28%)                                               | 33 (28%)                                                      |
| Southern                                                  | 20 (24%)                                               | 16 (24%)                                                 | 9 (20%)                                                | 33 (28%)                                                      |
| Western                                                   | 14 (17%)                                               | 13 (19%)                                                 | 11 (24%)                                               | 18 (15%)                                                      |
| <b>Program Size</b>                                       | <b>N (%)</b>                                           | <b>N (%)</b>                                             | <b>N (%)</b>                                           | <b>N (%)</b>                                                  |
| Total Residents ≤ 10                                      | 25 (29%)                                               | 12 (18%)                                                 | 5 (11%)                                                | 43 (36%)                                                      |
| Total Residents 11 – 15                                   | 27 (32%)                                               | 23 (34%)                                                 | 15 (33%)                                               | 37 (31%)                                                      |
| Total Residents > 15                                      | 34 (40%)                                               | 32 (48%)                                                 | 26 (57%)                                               | 38 (32%)                                                      |
