# Supplementary material for: Interview Invitations for Otolaryngology Residency Positions Across Demographic Groups Following Implementation of Preference Signaling
Source: PubMed Central journal article supplement (PMC9993176; doi:10.1001/jamanetworkopen.2023.1922), 2023-03-07
Supplement: jamanetwopen-e231922-s002.pdf [file jamanetwopen-e231922-s002.pdf]

## Data Sharing Statement

Pletcher. Interview Invitations for Otolaryngology Residency Positions Across Demographic Groups Following Implementation of Preference Signaling. *JAMA Netw Open*. Published March 07, 2023. doi:10.1001/jamanetworkopen.2023.1922

### Data

**Data available:** Yes

**Data types:** Data dictionary

**How to access data:** [steven.pletcher@ucsf.edu](mailto:steven.pletcher@ucsf.edu)

**When available:** With publication

### Supporting Documents

**Document types:** None

### Additional Information

**Who can access the data:** Data will be provided for researchers who desire to perform similar analyses

**Types of analyses:** Assessment of preference signaling outcomes

**Mechanisms of data availability:** Data dictionary will be provided after approval of the proposal by the primary author and a representative from the AAMC collaborating team
